# Supplementary material
Source: PubMed Central journal article supplement (PMC4141490)
Supplement: NIHMS122732-supplement-1_si_001.pdf [file NIHMS122732-supplement-1_si_001.pdf]

The overall under incorporation rate (UI) is calculated by taking the ratio of the area of peaks that correspond to under labeling to the total area of all isotopic peaks resulting from one glycan structure. (as shown in heavy spectrum of Fig. 3) For example, in heavy spectrum of Fig. 3, the area of isotopic peak (labeled as  $^{13}\text{C}_0^{15}\text{N}_0$ ,  $^{13}\text{C}_0^{15}\text{N}_1$ ,  $^{13}\text{C}_0^{15}\text{N}_2$ ,  $^{13}\text{C}_1^{15}\text{N}_2$ ,  $^{13}\text{C}_2^{15}\text{N}_2$ ,  $^{13}\text{C}_3^{15}\text{N}_2$ ,  $^{13}\text{C}_4^{15}\text{N}_2$ ) is  $A_i$  ( $i=1, 2, 3, 4, 5, 6, 7$ ), so the overall under incorporation rate (UI) can be calculated as:

$$UI = \frac{\sum_{i=1}^7 A_i}{\sum_{i=1}^7 A_i}$$

For any glycan structure, if the number of nitrogens in the molecule is K and the number of isotopic peaks shown in the spectrum is M,

$$UI = \frac{\sum_{i=1}^K A_i}{\sum_{i=1}^M A_i}$$

And the incorporation rate for each nitrogen can be calculated as:

$$Incorporation = \sqrt[K]{1 - UI}$$

The incorporation is 95% for the O-glycans we have shown for the quantifications.

To calculate the ratios of heavy to light glycan based on the spectrum of a mixture of two cell populations, we first generate the theoretical isotopic patterns for the light structure by a software called “emass” written by the Somerharju Lipid Group, University of Helsinki. (<http://www.helsinki.fi/science/lipids/software.html>) For example, in Fig. 6B, there are 7 isotopic peaks observed in the spectrum and the area of each peak is  $A_1$  through  $A_7$ , respectively. Due to the peak overlapping and under incorporation, both of the light and heavy structures can contribute to the area of each peak. So if the actual area resulting from light structure is  $L_1$  through  $L_7$ , from heavy structure is  $H_1$  through  $H_7$ , then we have:

$$L_1 + H_1 = A_1 \quad (1)$$

$$L_2 + H_2 = A_2 \quad (2)$$

$$L_3 + H_3 = A_3 \quad (3)$$

$$L_4 + H_4 = A_4 \quad (4)$$

$$L_5 + H_5 = A_5 \quad (5)$$

$$L_6 + H_6 = A_6 \quad (6)$$

$$L_7 + H_7 = A_7 \quad (7)$$

If the ratio of theoretical isotopic pattern for the 7 peaks from the light structure is  $P_1(=1):P_2:P_3:P_4:P_5:P_6:P_7$ , which we can generate by using the software “emass”, we can have:

$$L_1 = L_1 * P_1 (P_1 = 1) \quad (8)$$

$$L_2 = L_1 * P_2 \quad (9)$$

$$L_3 = L_1 * P_3 \quad (10)$$

$$L_4 = L_1 * P_4 \quad (11)$$

$$L_5 = L_1 * P_5 \quad (12)$$

$$L_6 = L_1 * P_6 \quad (13)$$

$$L_7 = L_1 * P_7 \quad (14)$$

By the definition of under incorporation rate we gave before,

$$UI = \frac{\sum_{i=1}^7 H_i}{\sum_{i=1}^7 L_i} \quad (15)$$

The value of UI can be determined based on the spectrum for heavy labeled glycans (not shown). Given that  $H_i = A_i - L_i$ , equation 15 can be rearranged, with a substitution of  $H_i$  into  $A_i$  and  $L_i$  according to equations 1 – 14, to yield equation 16:

$$L_1 = \frac{A_1 + A_2 + A_3 - UI * \sum_{i=1}^7 A_i}{P_1 + P_2 + P_3 - UI * \sum_{i=1}^7 P_i} \quad (16)$$

As far as we know  $L_1$ , we can calculate  $L_i$  ( $i=2-7$ ) and  $H_i$  ( $i=1-7$ ) based on equations 1-14. The equation for Heavy/Light ratio will be:

$$\frac{\text{Amide-}^{15}\text{N-GLN}}{\text{Amide-}^{14}\text{N-Gln}} = \frac{\sum_{i=1}^7 H_i}{\sum_{i=1}^7 L_i} \quad (17)$$

For any glycan structure, if the number of nitrogens in the molecule is K and the number of isotopic peaks shown in the spectrum of light/heavy mixture is M, the equations 16 and 17 can be rewritten as

$$L_1 = \frac{\sum_{i=1}^K A_i - UI * \sum_{i=1}^M A_i}{\sum_{i=1}^K P_i - UI * \sum_{i=1}^M P_i} \quad (18)$$

$$\frac{\text{Amide-}^{15}\text{N-GLN}}{\text{Amide-}^{14}\text{N-Gln}} = \frac{\sum_{i=1}^M H_i}{\sum_{i=1}^M L_i} \quad (19)$$
